# Supplementary material for: SIRT2-Mediated Deacetylation and Tetramerization of Pyruvate Kinase Directs Glycolysis and Tumor Growth
Source: Oxford University Press journal article supplement (doi:10.1158/0008-5472.can-15-2498), 2016-04-28
Supplement: 00085472can152498-sup-155355_2_supp_0_s600jy.doc [file 00085472can152498-sup-155355_2_supp_0_s600jy.doc]

**SUPPLEMENTAL Figure Legends**

**Supplemental Figure S1.** **PKM2 is acetylated by PCAF and Tip60.** **(a)** HEK-293T cells were transiently transfected by each HAT (p300/CBP, GCN5, PCAF, Tip60). Cell lysates were IPed using anti-flag-conjugated beads and separated by SDS-PAGE. Samples were then blotted with antibodies against acetyl-lysine or flag. **(b)** Endogenous PKM2 protein is acetylated by PCAF and Tip60. HeLa

cells were transiently transfected with pcDNA3.1 or HATs. The cell lysates were immunocaptured by endogenous PKM2 and then immunoblotted with anti-acetyl-lysine or anti-PKM2 antibodies. All experiments were done in triplicate. Representative imagers are shown. **(c)** For *in vitro* deacetylation assay, HEK-293T cells were transiently co-transfected with Flag-PKM2, PCAF, and Tip60. The cells were treated with TSA and nicotinamide for 12 h. Cell lysates were IPed using anti-flag-conjugated beads and eluted using flag peptides. Acetylated-PKM2 was subsequently mixed with eluted SIRT1, SIRT2, SIRT6, or HDAC6 in the presence of NAD+, and the reaction mixtures were separated by SDS-PAGE and immunoblotted with anti-pan-acetyl-lysine and flag antibodies. NAM used as an inhibitor of SIRT protein deacetylation activity. TSA used as an inhibitor of HDAC protein deacetylation activity. Representative anti-flag images are shown HDAC6, SIRT1, PKM2, SIRT6, and SIRT2 proteins. The SIRT-mediated deacetylation of the protein substrate is inhibited when cells are treated with NAM. **(d)** PKM2 was knocked down using PKM2-shRNA in Sirt2-/--MMT, H1299, and MCF7 cells. Cells were lysed and extracts were immunoblotted with anti-PKM1, PKM2, and GAPDH antibodies. When PKM2 protein levels were decreased, PKM1 levels were not changed. Muscle is used as a positive control of PKM1.

**Supplemental Figure S2.** ***SIRT2*-knockdown stable MCF7, MDA-MB-231, and HeLa cell lines showed decreased PK activity and increased glycolysis rate.** **(a)** PKM2 activity and **(b)** glycolysis rate (lactate production) are shown. Lysates from control and *SIRT2*-knockdown cell lines were IPed with anti-SIRT2 and tubulin antibodies. Error bars show the standard deviation. All experiments were done in triplicate. Representative imagers are shown.

**Supplemental Figure S3.** **LC-Ms/Ms analysis to detect potentially reversible acetylation sites of PKM2 peptide.** **(a)** LC-MS/MS of PKM2 peptide showing the acetylation of PKM2 K305. HeLa cells were treated with 1 µM of TSA and transfected with HATs (p300/CBP, PCAF, GCN5, Tip60) with either a SIRT2 or GFP expression vector. Cellular protein extracts were analyzed by LC-MS-MS for the acetylation intensity of PKM2 peptides using an LTQ-Orbitrap mass spectrometer. **(b-c)** Multiple species contain a potentially reversible PKM2 acetyl-lysine. The PKM2 protein sequence from multiple species was BLASTed based on two potential reversible acetyl-lysines that were identified at PKM2 amino acids 62 **(b)** and305 **(c)** as identified in human, dog, horse, mouse, Xenopus, and bovine species by genomic analysis.

**Supplemental Figure S4. *Sirt2*-/--MMT cell growth was inhibited by SIRT2 and PKM2-deacetylation mimic mutants**. PKM2-WT and acetylation mimic mutants of PKM2 (PKM2-K62R, -K305R, and -K62R/305R) are re-expressed in *Sirt2*-/--MMT cells in which endogenous PKM2 has been knocked down. Samples were blotted with anti-PKM2 anti-GAPDH antibodies. Endo, endogenous; exo, exogenous.

**Supplemental Figure S5.** **PKM2 deacetylation mimic mutants (K62R and K305R) increased PKM2 tetramer formation.** HeLa cells were transfected with HATs (PCAF/Tip60) with either *Flag-PKM2*-*WT* or the *PKM2* deacetylation mimic expression vectors *Flag-PKM2*K62R, *Flag-PKM2*K305R, and *Flag-PKM2*K62/K305R. Cells were lysed and eluted by Flag-peptide, and the PKM2 proteins were separated by native-PAGE and SDS-PAGE and immunoblotted with anti-PKM2 and tubulin antibodies. Experiments were done in triplicate. Representative imagers are shown.
